# Supplementary material for: Photocatalytic water disinfection by simple and low-cost monolithic and heterojunction ceramic wafers
Source: Royal Society of Chemistry journal article supplement (doi:10.1039/c5pp00002e), 2015-05-07
Supplement: c5pp00002e1.pdf [file c5pp00002e1.pdf]

## Supplementary Information

### Photocatalytic water disinfection by simple and low-cost monolithic and heterojunction ceramic wafers

Neel M. Makwana<sup>a</sup>, Rachael Hazael<sup>a</sup>, Paul F. McMillan<sup>a</sup>, and Jawwad A. Darr<sup>\*a</sup>

<sup>a</sup> Christopher Ingold Laboratories, Department of Chemistry, University College London, 20 Gordon Street, London, WC1H 0AJ, United Kingdom

\*Corresponding author email: [j.a.darr@ucl.ac.uk](mailto:j.a.darr@ucl.ac.uk)

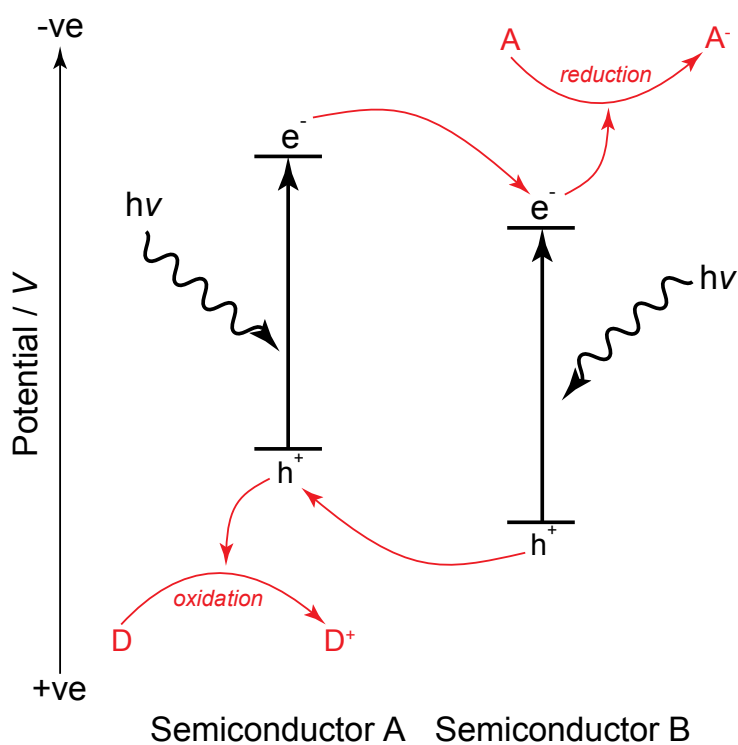

**Fig. S1** Band energy diagram for a type II staggered bandgap heterostructure. Under photoirradiation, electrons can transfer across the heterojunction from the conduction band (CB) of semiconductor A to the CB of semiconductor B; conversely, holes can transfer from the valence band (VB) of semiconductor B to the VB of semiconductor A.

### Material characterisation

X-ray diffraction (XRD) data was collected using a Stoe Stadi P diffractometer (Mo-K $\alpha$  radiation, 0.70932 Å) in transmission geometry (2 - 40° 2 $\theta$  range, 0.5° step size and 5 sec/step dwell). Field emission scanning electron microscopy (FE-SEM) images were obtained with a JEOL JSM-6700F microscope operating at 5 kV accelerating voltage. As-prepared ceramic wafers were cracked to expose the cross-sectional interface between the TiO<sub>2</sub> and WO<sub>3</sub> layers, and all samples were gold coated prior to imaging. Image analysis was performed using ImageJ software (version 1.48v).

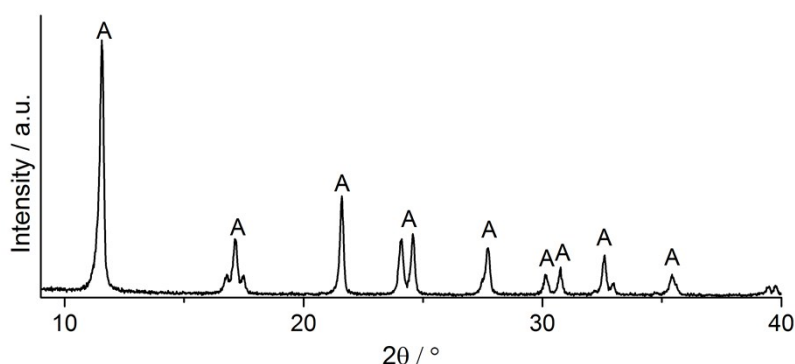

**Fig. S2** X-ray diffraction (XRD) pattern of anatase TiO<sub>2</sub> phase of the TiO<sub>2</sub>-WO<sub>3</sub> wafer following heat-treatment at 500 °C for 6 hours.

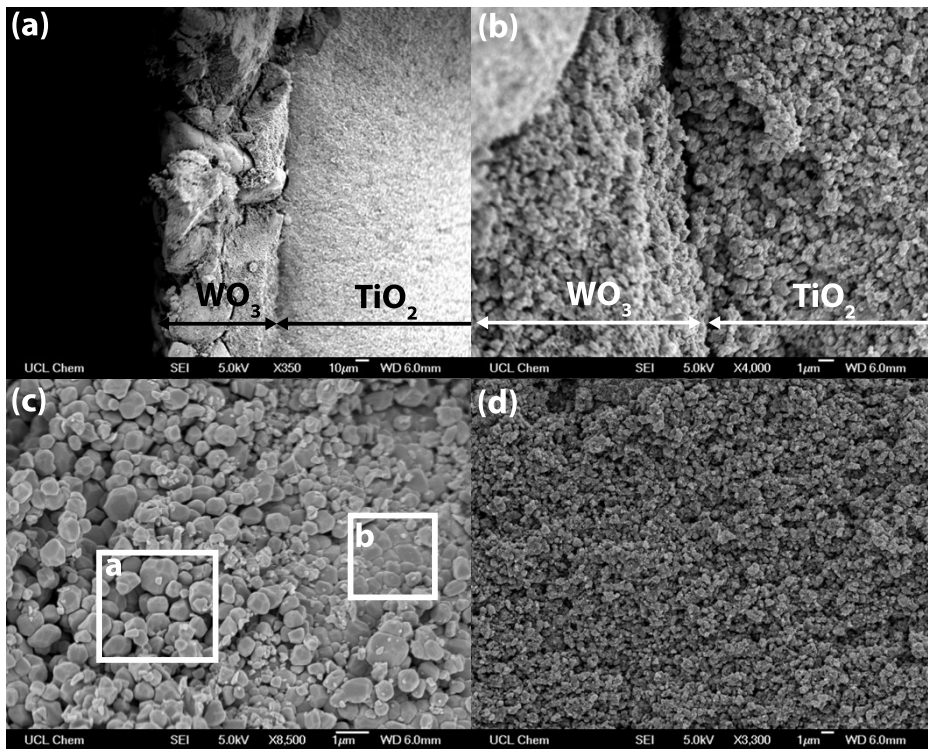

**Fig. S3** Field emission scanning electron microscopy (FE-SEM) images of the  $\text{TiO}_2$ - $\text{WO}_3$  ceramic wafer heterojunction. Images (a) and (b) identify the  $\text{TiO}_2$  and  $\text{WO}_3$  layers and the physical interface between the two layers. Image (c) shows the  $\text{WO}_3$  layer, with the area marked *a* showing loosely bound particles resulting from the disrupted physical interaction when the ceramic wafer was prepared for imaging. The area marked *b* shows particles in very close contact, as a result of the compaction (occurring in the horizontal plane) of the powder upon preparation of the ceramic wafer. Image (d) shows the  $\text{TiO}_2$  layer.

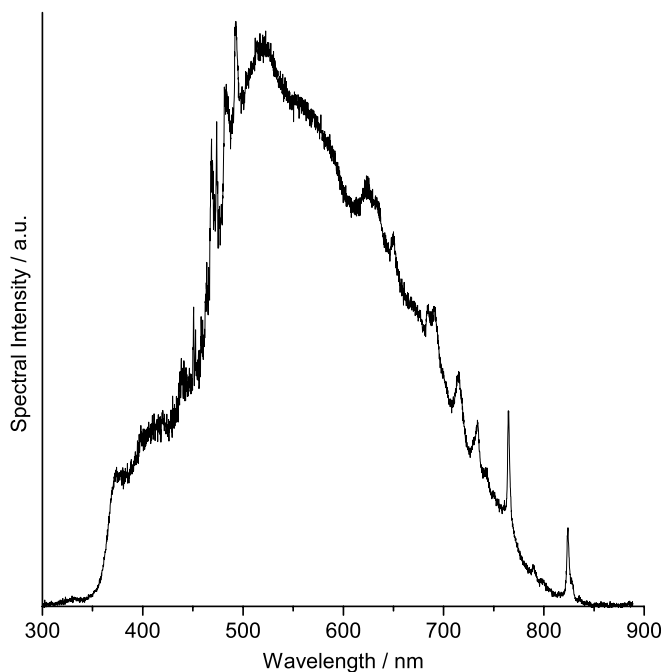

**Fig. S4** Spectral output of 75 W Xenon lamp
